# Supplementary material
Source: MDPI journal article supplement (https://www.mdpi.com/2071-1050/14/11/6659)
Supplement: s1 [file s1]

**Table S1.** Search strategy and keywords used to identify relevant papers.

| Number | Criteria and keywords used for the search                                                                                                               |
|--------|---------------------------------------------------------------------------------------------------------------------------------------------------------|
| 1      | Boolean logic such as “AND”, “OR”, “NOT” were used                                                                                                      |
| 2      | Efficacy of millets on lipid profile.                                                                                                                   |
| 3      | Impact of consuming millets on lipid profile                                                                                                            |
| 4      | Efficacy of millets on total cholesterol level in human. Replaced the word “total cholesterol” with triacylglycerol, triglyceride, LDL-C, VLDL-C, HDL-C |



**Table S2.** Study characteristics of the eligible studies used in the meta-analysis

| S.No | Author                      | Type of millet | Test meal/amount consumed (g/ml) | Parameter studied                                                  | Sample size, intervention/control | Age group (yrs) | Study design and duration                                                                                                                               |
|------|-----------------------------|----------------|----------------------------------|--------------------------------------------------------------------|-----------------------------------|-----------------|---------------------------------------------------------------------------------------------------------------------------------------------------------|
| 1    | Kumari et al., 2020         | Finger millet  | Porridge/not mentioned           | Total cholesterol                                                  | 18/18                             | 45.6 ± 5.6      | Randomised cross over study conducted by feeding finger millet porridge to intervention group for 8 weeks. Control group was consuming regular diet.    |
| 2    | Ugare et al., 2014          | Banyard millet | Porridge/78g                     | Total cholesterol, triglyceride, LDL-C, VLDL-C, HDL-C              | 9/9, 6/6                          | 37 to 40 yrs    | breakfast, lunch and dinner was provided with barnyard millet upma or rice form for 28 days.                                                            |
| 3    | Geetha et al., 2019         | Mixed millet   | Dumpling/not mentioned           | Total cholesterol, triglyceride, LDL-C, VLDL-C, HDL-C, BMI, Weight | 30/30                             | Not indicated   | Randomised feeding intervention were millet dumpling was given for lunch to intervention group for 120 days. Control group were consuming regular diet. |
| 4    | Anusha et al., 2018         | Foxtail millet | Meal/65g                         | Total cholesterol, triglyceride, LDL-C, VLDL-C, HDL-C              | 12/12                             | 20 to 50 yrs    | quinoa was given for a month and then after a washout period of 15 days foxtail millet diet was given for 30days in place of rice.                      |
| 5    | Tiwari and Srivastava, 2017 | Finger millet  | Bun/200g                         | Total cholesterol, triglyceride, LDL-C, VLDL-C, HDL-C              | 15/15                             | 40 to 50 yrs    | Low GI finger millet bun was fed to intervention group for 60 days. documented                                                                          |
| 6    | Thathola et al., 2010       | Foxtail millet | Biscuit and Burfi/100g           | Total cholesterol, triglyceride, LDL-C, VLDL-C, HDL-C              | 10/10                             | 36 to 78 yrs    | Case-control clinical trial followed by cross over clinical trial conducted for 30 days by feeding biscuit and 30days by feeding burfi.                 |



|    |                            |                 |                                                         |                                                                                                                          |       |              |                                                                                                                                                                                                                  |
|----|----------------------------|-----------------|---------------------------------------------------------|--------------------------------------------------------------------------------------------------------------------------|-------|--------------|------------------------------------------------------------------------------------------------------------------------------------------------------------------------------------------------------------------|
| 7  | Anushia et al., 2019       | Millet          | Meal/not mentioned                                      | Total cholesterol, triglyceride, LDL-C, BMI                                                                              | 44/44 | 30 to 50 yrs | Randomised trial in which the intervention group received counselling to include millet in daily diet (n=44) and was monitored through telephone for 3 months. Control group were consuming regular diet (n=44). |
| 8  | Itagi et al., 2012         | Foxtail millet  | Meal/80g                                                | Total cholesterol, triglyceride, HDL-C                                                                                   | 9/6   | >40 yrs      | Low GI foxtail millet diabetic mix was fed to the intervention group for 4 weeks.                                                                                                                                |
| 9  | Joshi and Srivastava, 2019 | Banyard millet  | Cooked by boiling with water (similar to rice)/100g     | Total cholesterol, triglyceride, LDL-C, VLDL-C, HDL-C                                                                    | 15/15 | 24-26        | Barnyard millet was fed to diabetic subjects for 3 months and control group was consuming their regular diet.                                                                                                    |
| 10 | Anunciacao et al., 2019    | Sorghum         | breakfast cereal and drink made of extruded sorghum/40g | Weight, BMI                                                                                                              | 24/24 | 18-40        | Randomised controlled trial to test sorghum meal against wheat meal for its benefit in reducing body fat in overweight men was conducted for 8 weeks.                                                            |
| 11 | Sobhana et al., 2020       | Mixed millet    | Roti/90g                                                | Total cholesterol, triglyceride, LDL-C, VLDL-C, HDL-C, weight, BMI, systolic blood pressure and diastolic blood pressure | 47/47 | 51.72 ± 1.09 | Millet-based roti was fed to intervention group (n=47) for 90 days and control group (n=47) was consuming regular diet.                                                                                          |
| 12 | Surekha et al., 2013       | Barnyard millet | Health food/88g                                         | Total cholesterol, triglyceride, LDL-C, VLDL-C, HDL-C, weight, TC:HDL ratio, LDL-HDL ratio                               | 7/6   | 25-45 yrs    | Millet-based health food was provided as a meal for 28days and control group was consuming regular diet.                                                                                                         |



**Table S3. Changes in blood lipid profile and BMI**

|                             | Treatment group |                                                     | Control group |                                                     |
|-----------------------------|-----------------|-----------------------------------------------------|---------------|-----------------------------------------------------|
| Blood lipid profile and BMI | % change        | <i>p</i> (Wilcoxon matched-pairs signed-ranks test) | % change      | <i>p</i> (Wilcoxon matched-pairs signed-ranks test) |
| Total cholesterol           | -6.6            | 0.011                                               | +0.8          | 0.311                                               |
| Triacylglycerol             | -8.2            | 0.002                                               | +1.6          | 0.480                                               |
| LDL-C                       | -11.7           | 0.003                                               | +1.4          | 1.000                                               |
| VLDL-C                      | -7.9            | 0.003                                               | +5.9          | 1.000                                               |
| HDL-C                       | +6.1            | 0.010                                               | -4.6          | 0.004                                               |
| BMI                         | -2.5            | 0.068                                               | +0.1          | 0.715                                               |



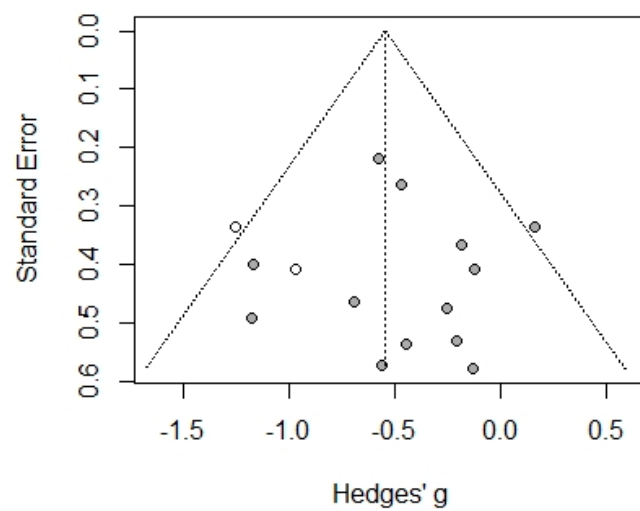

Figure S1: Total cholesterol funnel plot

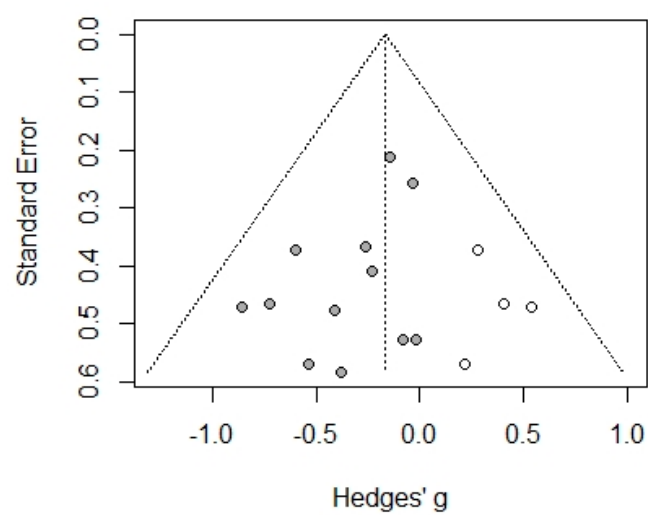

Figure S2: Triacylglycerol funnel plot



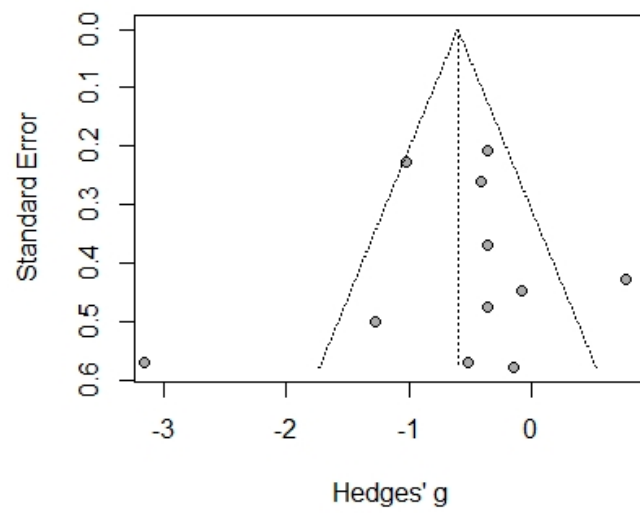

Figure S3: LDL-C funnel plot

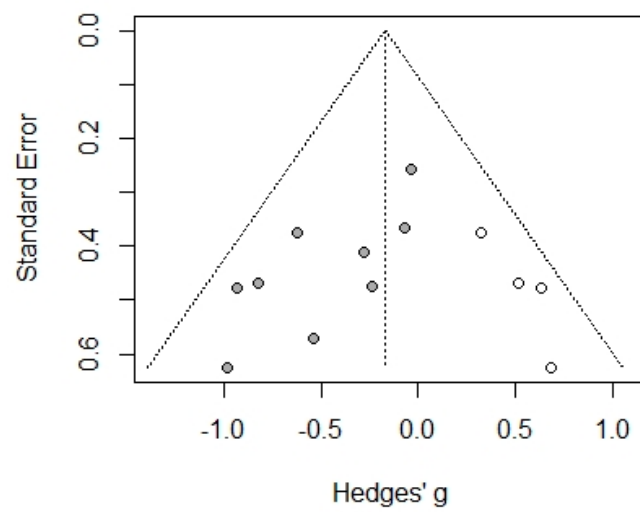

Figure S4: VLDL-C funnel plot



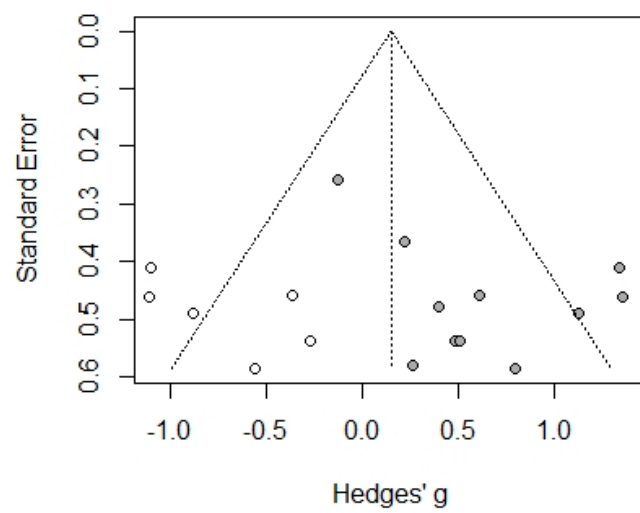

Figure S5: HDL-C funnel plot

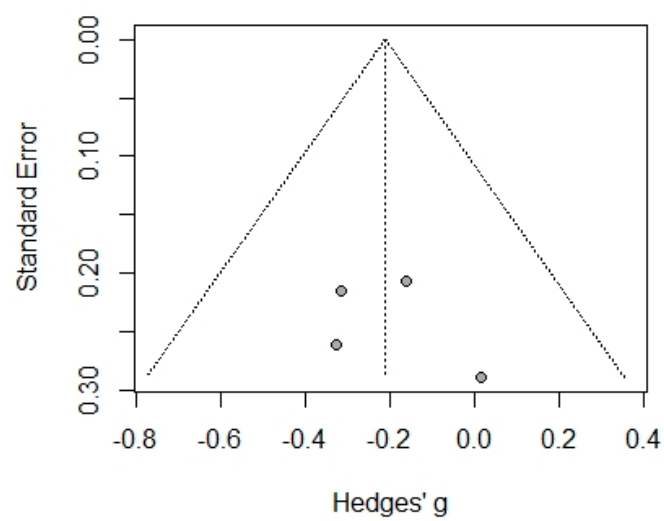

Figure S6: BMI funnel plot
